# Supplementary material for: Two-Dimensional VSi2X2N2 (X = P, As, Sb, Bi) Janus Monolayers: Spin-Polarized Electronic Structure and Perpendicular Magnetic Anisotropy
Source: MDPI journal article supplement (doi:10.3390/cryst13071007), 2023-06-25
Supplement: s1 [file s1]

*Article*

# **Two-Dimensional $\text{VSi}_2\text{X}_2\text{N}_2$ ( $\text{X} = \text{P}, \text{As}, \text{Sb}, \text{Bi}$ ) Janus Monolayers: Spin-Polarized Electronic Structure and Perpendicular Magnetic Anisotropy**

Zhenxian Zhao <sup>1</sup>, Xiaocha Wang <sup>1,\*</sup> and Wenbo Mi <sup>2</sup>

<sup>1</sup> Tianjin Key Laboratory of Film Electronic & Communicate Devices, School of Integrated Circuit Science and Engineering, Tianjin University of Technology, Tianjin 300384, China

<sup>2</sup> Tianjin Key Laboratory of Low Dimensional Materials Physics and Preparation Technology, School of Science, Tianjin University, Tianjin 300354, China

\* Correspondence: wangxccn@126.com

**Table S1.** The bond lengths and bond angles of  $\text{VSi}_2X_2\text{N}_2$  ( $X = \text{N, P, As, Sb, Bi}$ ).

|                 |                                     | $\text{VSi}_2\text{P}_2\text{N}_2$ | $\text{VSi}_2\text{As}_2\text{N}_2$ | $\text{VSi}_2\text{Sb}_2\text{N}_2$ | $\text{VSi}_2\text{Bi}_2\text{N}_2$ |
|-----------------|-------------------------------------|------------------------------------|-------------------------------------|-------------------------------------|-------------------------------------|
| Bond length (Å) | $X_2\text{-Si}_2$                   | 2.16                               | 2.35                                | 2.99                                | 3.18                                |
|                 | $\text{Si}_2\text{-}X_1$            | 2.20                               | 3.87                                | 3.23                                | 3.24                                |
|                 | $X_1\text{-V}$                      | 2.35                               | 2.47                                | 2.88                                | 2.96                                |
|                 | $\text{V-N}_1$                      | 3.70                               | 2.02                                | 2.01                                | 2.01                                |
|                 | $\text{N}_1\text{-Si}_1$            | 3.55                               | 3.54                                | 3.49                                | 3.55                                |
|                 | $\text{Si}_1\text{-N}_2$            | 1.84                               | 1.83                                | 1.80                                | 1.83                                |
| Bond angle (°)  | $X_2\text{-Si}_2\text{-}X_1$        | 109.22                             | 113.34                              | 144.42                              | 146.04                              |
|                 | $\text{Si}_2\text{-}X_1\text{-V}$   | 80.97                              | 85.65                               | 142.89                              | 143.14                              |
|                 | $X_1\text{-V-N}_1$                  | 69.88                              | 72.32                               | 131.54                              | 129.77                              |
|                 | $\text{V-N}_1\text{-Si}_1$          | 65.45                              | 64.80                               | 67.02                               | 64.46                               |
|                 | $\text{N}_1\text{-Si}_1\text{-N}_2$ | 52.54                              | 52.75                               | 53.96                               | 52.71                               |
|                 |                                     |                                    |                                     |                                     |                                     |

**Table S2.** Atomic coordinates of the optimized structure of VSi<sub>2</sub>P<sub>2</sub>N<sub>2</sub> monolayer.

|                 | $x$                | $y$                | $z$                |
|-----------------|--------------------|--------------------|--------------------|
| P <sub>1</sub>  | 0.6666686270878315 | 0.3333314399121705 | 0.5050739936883875 |
| P <sub>2</sub>  | 0.3333332664599762 | 0.6666667125400253 | 0.6268130177652153 |
| N <sub>1</sub>  | 0.6666685309369211 | 0.3333315360630808 | 0.4152721547705426 |
| N <sub>2</sub>  | 0.3333336145708446 | 0.6666663644291574 | 0.3368278792805816 |
| V               | 0.0000022097204372 | 0.0000022097204372 | 0.4506716777719242 |
| Si <sub>1</sub> | 0.6666670065202032 | 0.3333330604797989 | 0.3528557464600939 |
| Si <sub>2</sub> | 0.6666669687037831 | 0.3333330982962189 | 0.5831755382632576 |

**Table S3.** Atomic coordinates of the optimized structure of VSi<sub>2</sub>As<sub>2</sub>N<sub>2</sub> monolayer.

|                 | $x$                | $y$                | $z$                |
|-----------------|--------------------|--------------------|--------------------|
| As <sub>1</sub> | 0.6666838020279595 | 0.3333162649720427 | 0.5036813742146935 |
| As <sub>2</sub> | 0.3333298306667071 | 0.6666701483332945 | 0.6359709330855509 |
| N <sub>1</sub>  | 0.6666699557446215 | 0.3333301112553805 | 0.4125484532768726 |
| N <sub>2</sub>  | 0.3333310736712318 | 0.6666689053287700 | 0.3370464565196497 |
| V               | 0.0000051213847297 | 0.9999948786152707 | 0.4452831621051264 |
| Si <sub>1</sub> | 0.6666664144019874 | 0.3333336525980146 | 0.3525682911159234 |
| Si <sub>2</sub> | 0.6666540261027670 | 0.3333460408972350 | 0.5835913376821853 |



**Table S4.** Atomic coordinates of the optimized structure of VSi<sub>2</sub>Sb<sub>2</sub>N<sub>2</sub> monolayer.

|                 | $x$                | $y$                | $z$                |
|-----------------|--------------------|--------------------|--------------------|
| Sb <sub>1</sub> | 0.6666665795485410 | 0.3333334874514615 | 0.5019840731830711 |
| Sb <sub>2</sub> | 0.3333314222492834 | 0.6666685567507163 | 0.6892654170201415 |
| N <sub>1</sub>  | 0.6666651360755185 | 0.3333349309244868 | 0.3922846590070920 |
| N <sub>2</sub>  | 0.3333363634950714 | 0.6666636155049300 | 0.3183268055502706 |
| V               | 0.9999969858501212 | 0.0000030141498768 | 0.4259442984796729 |
| Si <sub>1</sub> | 0.6666698201841047 | 0.3333302468158973 | 0.3340237055614083 |
| Si <sub>2</sub> | 0.6666739165973508 | 0.3333261504026514 | 0.6088610491983447 |

**Table S5.** Atomic coordinates of the optimized structure of VSi<sub>2</sub>Bi<sub>2</sub>N<sub>2</sub> monolayer.

|                 | <i>x</i>           | <i>y</i>           | <i>z</i>           |
|-----------------|--------------------|--------------------|--------------------|
| Bi <sub>1</sub> | 0.6666689344962563 | 0.3333311325037456 | 0.4975510481970475 |
| Bi <sub>2</sub> | 0.3333349980017413 | 0.6666649809982603 | 0.6719813870948577 |
| N <sub>1</sub>  | 0.6666684330050422 | 0.3333316339949601 | 0.3993499815496128 |
| N <sub>2</sub>  | 0.3333348908478208 | 0.6666650881521807 | 0.3336806094294349 |
| V               | 0.0000017935703357 | 0.9999982064296640 | 0.4272726582631327 |
| Si <sub>1</sub> | 0.6666682123142769 | 0.3333318546857253 | 0.3470602717747436 |
| Si <sub>2</sub> | 0.6666629617645241 | 0.3333371052354782 | 0.5937940516911737 |

**Table S6.** The charge transfer of each atom of VSi<sub>2</sub>X<sub>2</sub>N<sub>2</sub> monolayer.

|                                                 | $\Delta q_{X1}(e)$ | $\Delta q_{N1}(e)$ | $\Delta q_{N2}(e)$ | $\Delta q_{X2}(e)$ | $\Delta q_V(e)$ | $\Delta q_{Si1}(e)$ | $\Delta q_{Si2}(e)$ |
|-------------------------------------------------|--------------------|--------------------|--------------------|--------------------|-----------------|---------------------|---------------------|
| VSi <sub>2</sub> P <sub>2</sub> N <sub>2</sub>  | -0.6343            | 0.0706             | -0.0828            | -0.8388            | 0.2754          | 0.1029              | 1.107               |
| VSi <sub>2</sub> As <sub>2</sub> N <sub>2</sub> | -0.9446            | 0.0902             | -0.0736            | -1.7252            | 0.3289          | 0.0954              | 2.2289              |
| VSi <sub>2</sub> Sb <sub>2</sub> N <sub>2</sub> | -1.2663            | 0.07               | -0.0431            | -2.2374            | 0.434           | 0.068               | 2.9747              |
| VSi <sub>2</sub> Bi <sub>2</sub> N <sub>2</sub> | -1.3339            | 0.1043             | -0.0757            | -2.2748            | 0.4313          | 0.1137              | 3.035               |

**Table S7.** The lattice constants ( $a=b$ ), magnetic moment ( $M$ ) and MAE of  $\text{VSi}_2X_2$  ( $X=\text{P, As, Sb, Bi}$ ).

|                           | $a=b$ (Å) | $M$ ( $\mu_B$ ) |
|---------------------------|-----------|-----------------|
| $\text{VSi}_2\text{P}_2$  | 3.27      | 1.28            |
| $\text{VSi}_2\text{As}_2$ | 3.49      | /               |
| $\text{VSi}_2\text{Sb}_2$ | 3.11      | 1.42            |
| $\text{VSi}_2\text{Bi}_2$ | 3.25      | /               |

**Table S8.** The bond lengths (Å) and bond angle (°) of VSi<sub>2</sub>Sb<sub>2</sub>N<sub>2</sub> under different electric field.

|      | V-Sb  | V-N   | Sb1-Si1 | Sb2-Si2 | Sb-V-N         |
|------|-------|-------|---------|---------|----------------|
| -0.6 | 2.881 | 2.015 | 3.279   | 2.984   | 131.536/86.226 |
| -0.4 | 2.869 | 2.022 | 3.172   | 3.017   | 130.324/84.672 |
| -0.2 | 2.881 | 2.015 | 3.248   | 2.987   | 131.524/86.212 |
| 0    | 2.881 | 2.014 | 3.230   | 2.988   | 131.536/86.234 |
| +0.2 | 2.870 | 2.020 | 3.153   | 3.021   | 130.231/84.619 |
| +0.4 | 2.881 | 2.014 | 3.218   | 2.988   | 131.530/86.219 |
| +0.6 | 2.880 | 2.013 | 3.213   | 2.992   | 131.460/86.145 |

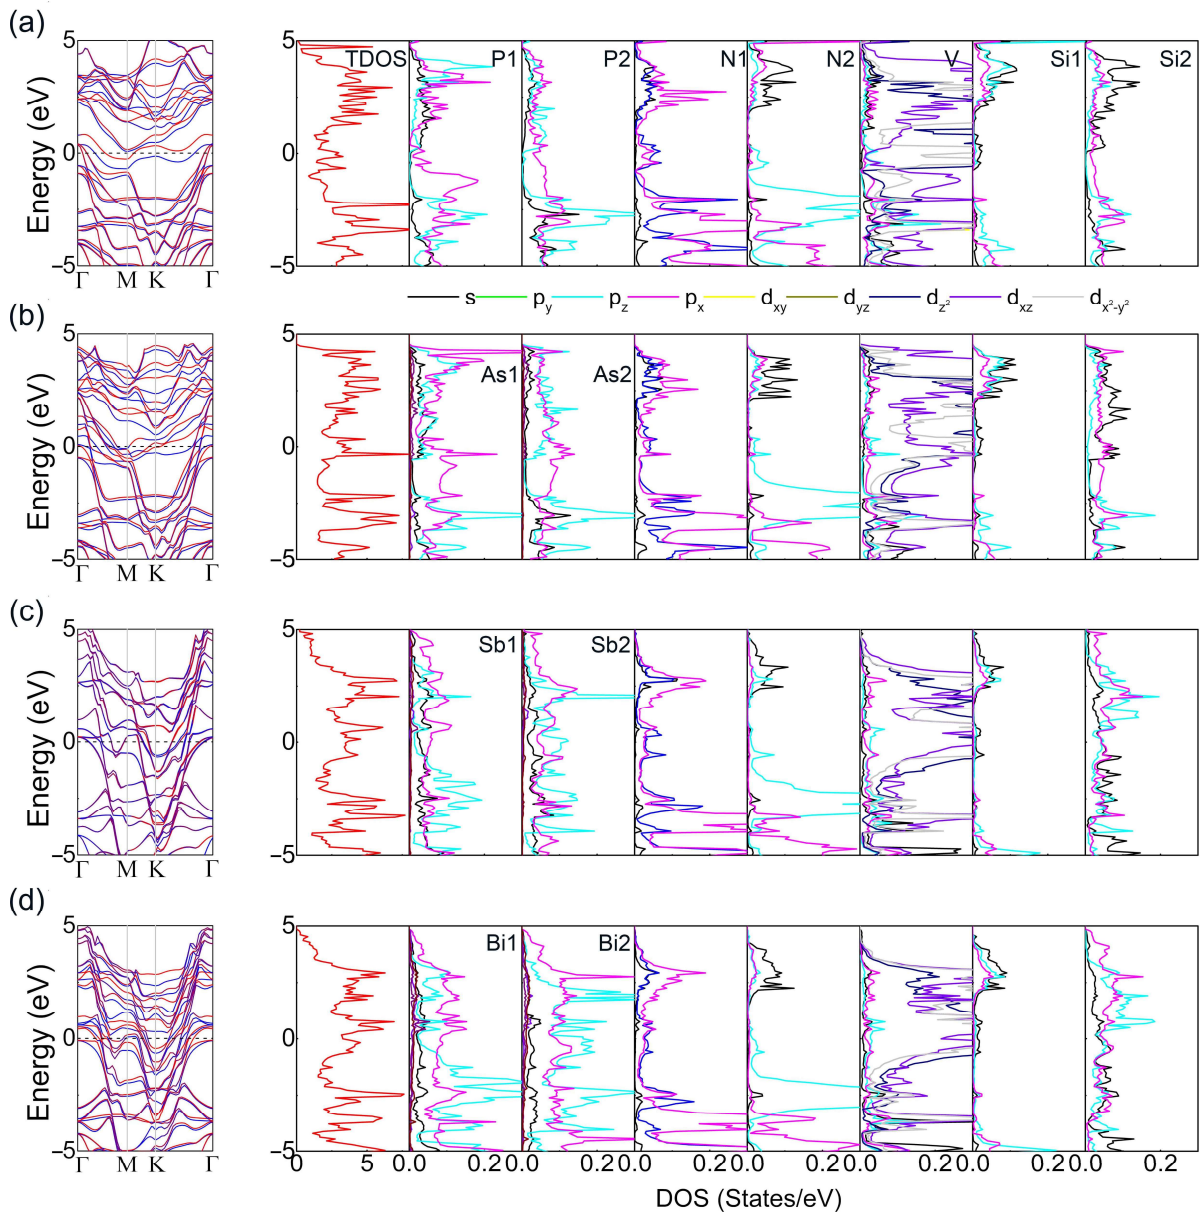

**Figure S1.** The band structure and density of states of (a)  $\text{VSi}_2\text{P}_2\text{N}_2$ , (b)  $\text{VSi}_2\text{As}_2\text{N}_2$ , (c)  $\text{VSi}_2\text{Sb}_2\text{N}_2$ , (d)  $\text{VSi}_2\text{Bi}_2\text{N}_2$  with SOC. The Fermi level is set to zero.

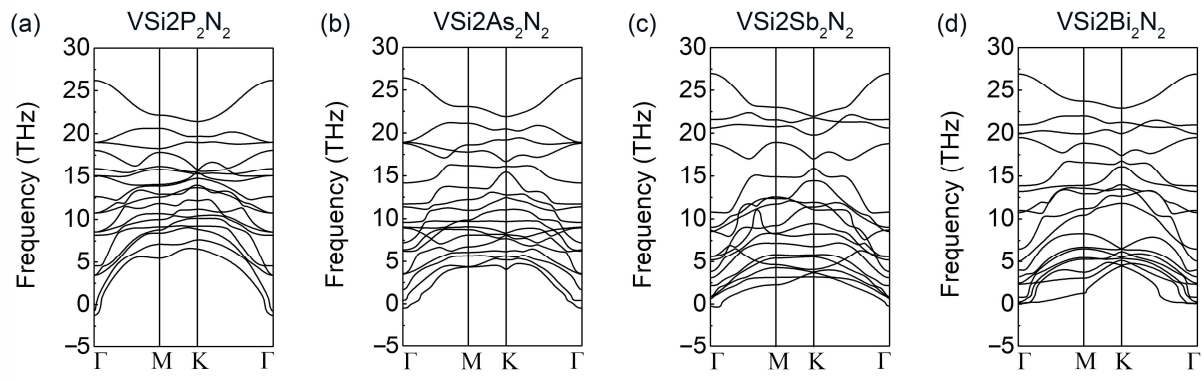

**Figure S2.** Phonon spectrum of the (a-d)  $\text{VSi}_2\text{X}_2\text{N}_2$  monolayer.

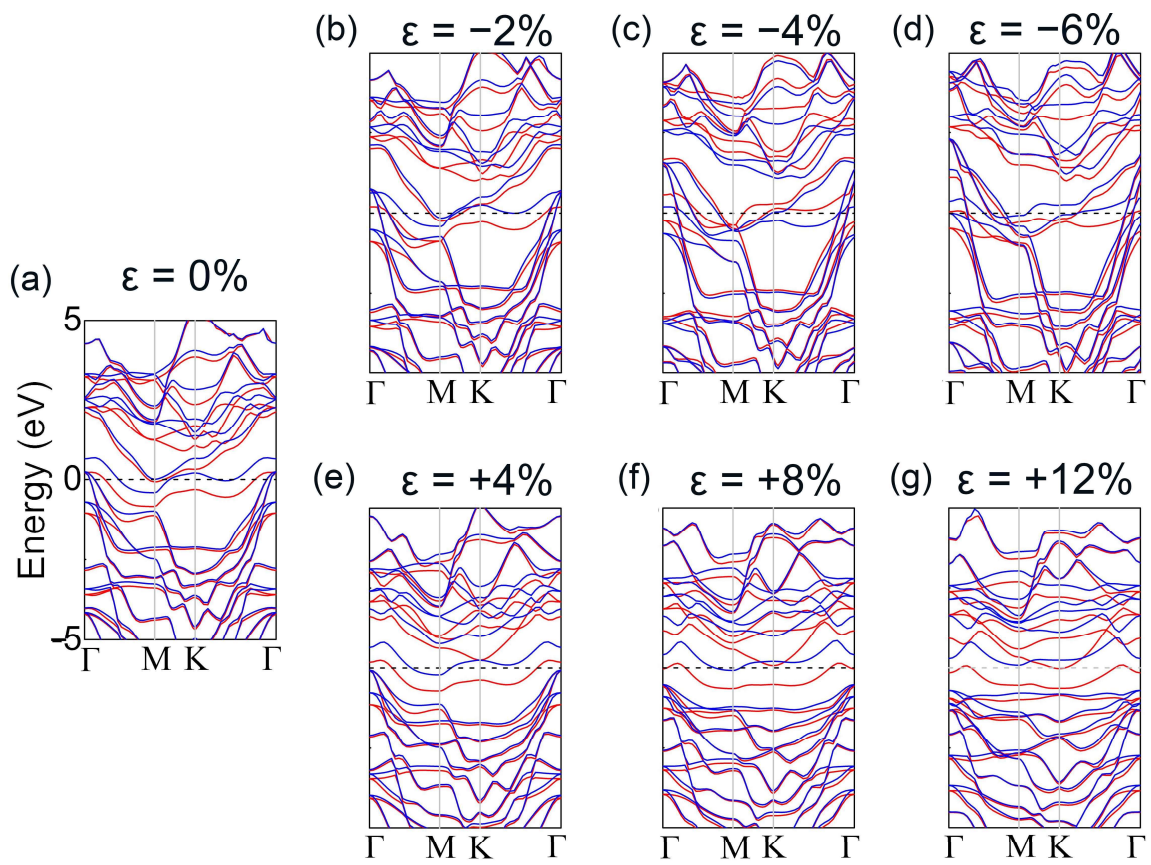

**Figure S3.** The band structure of  $\text{VSi}_2\text{P}_2\text{N}_2$  under different biaxial strain. Red and blue lines in (a-g) represent the spin-up and spin-down band.



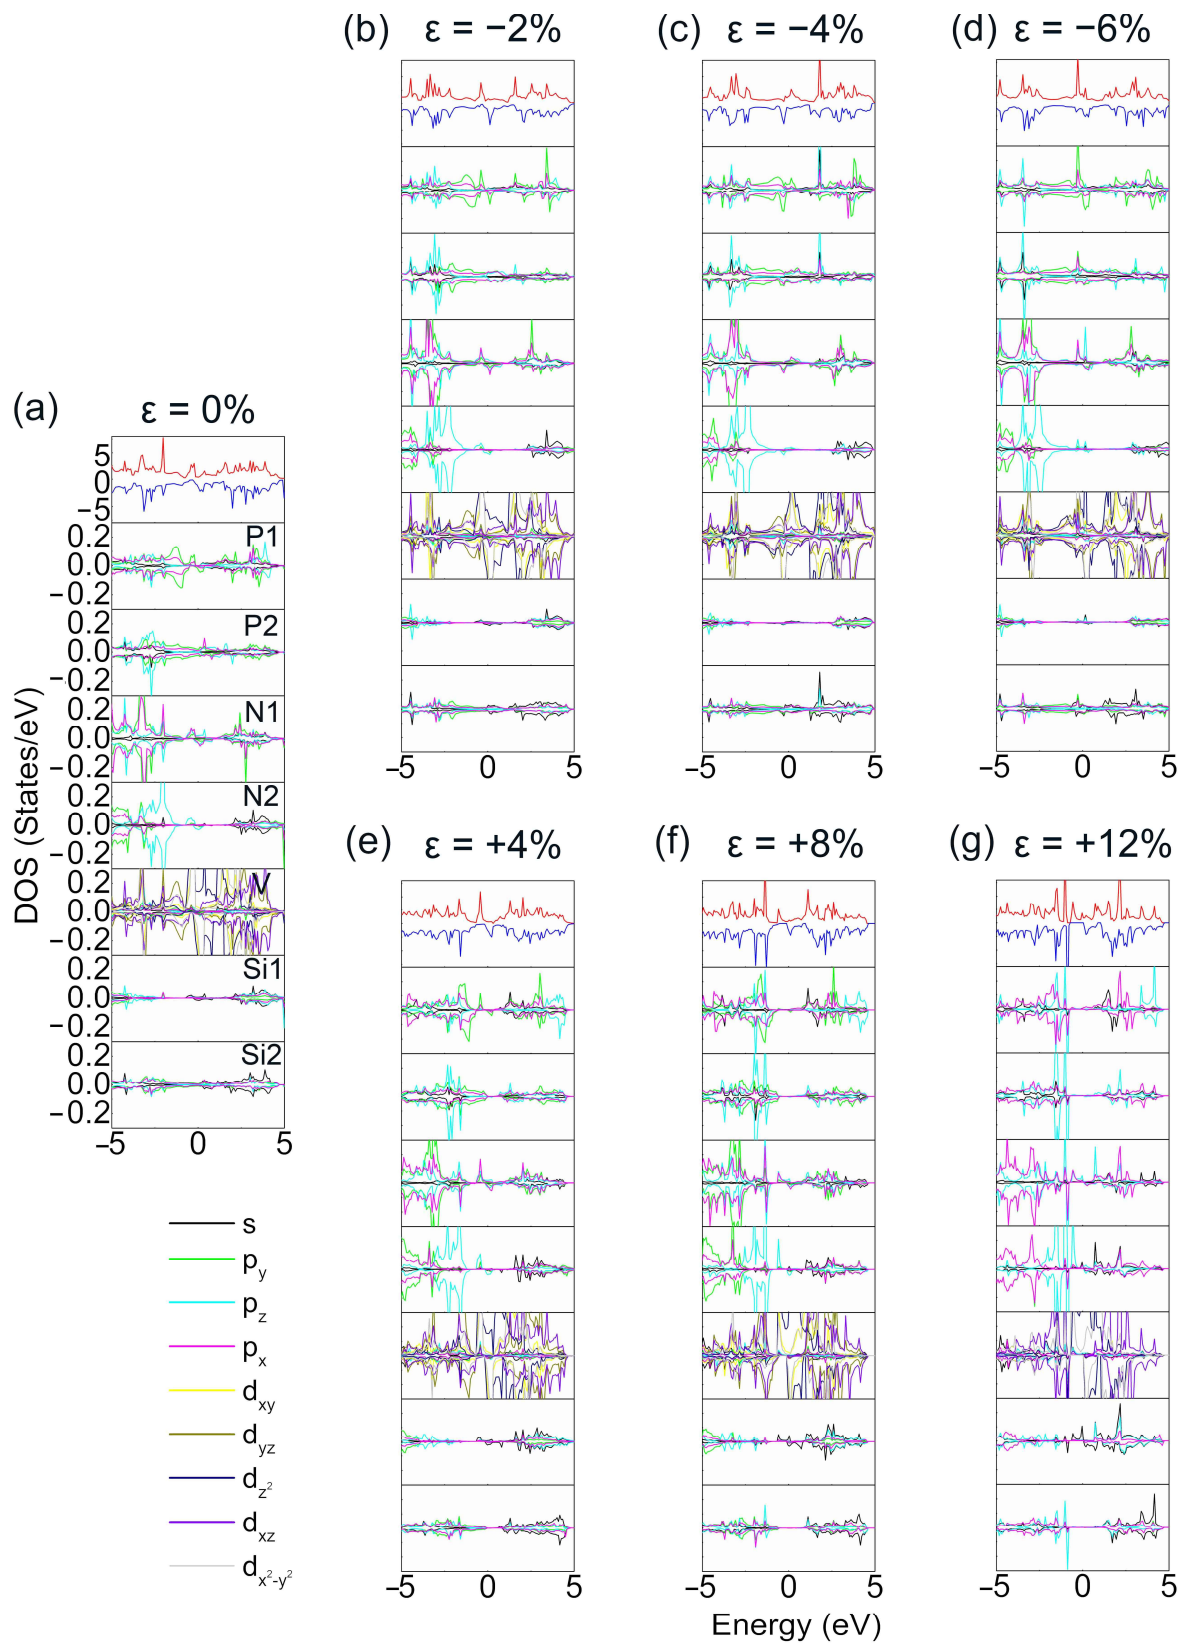

**Figure S4.** The density of states of (a-g)  $\text{VSi}_2\text{P}_2\text{N}_2$  under different biaxial strain.

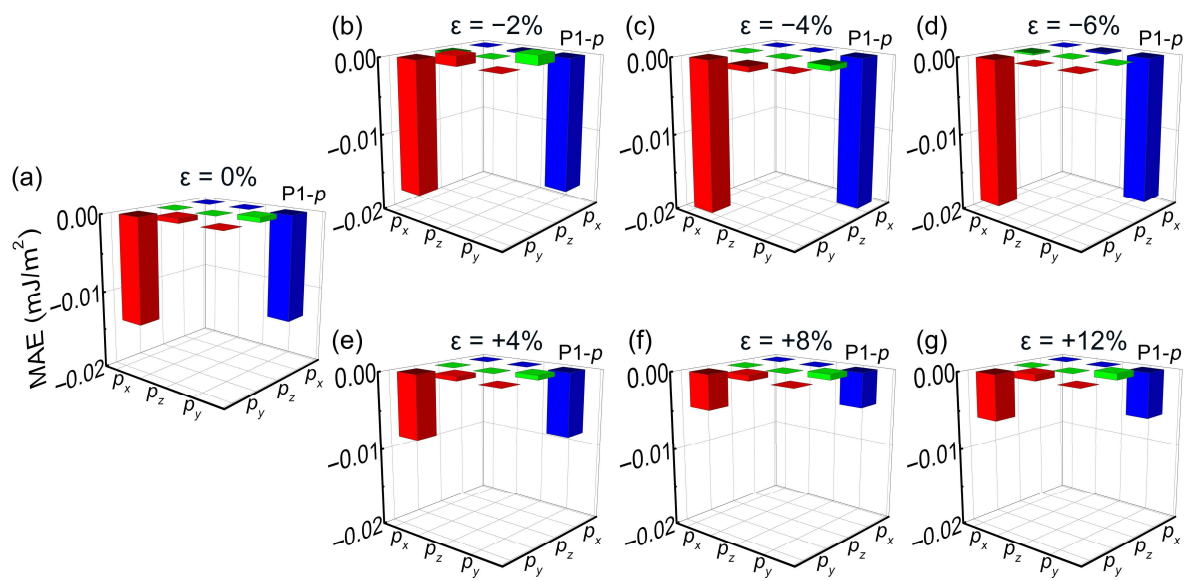

**Figure S5.** (a)-(g) Orbital-resolved MAE of P1- $p$  orbitals in  $\text{VSi}_2\text{P}_2\text{N}_2$  at different in-plane biaxial strains.

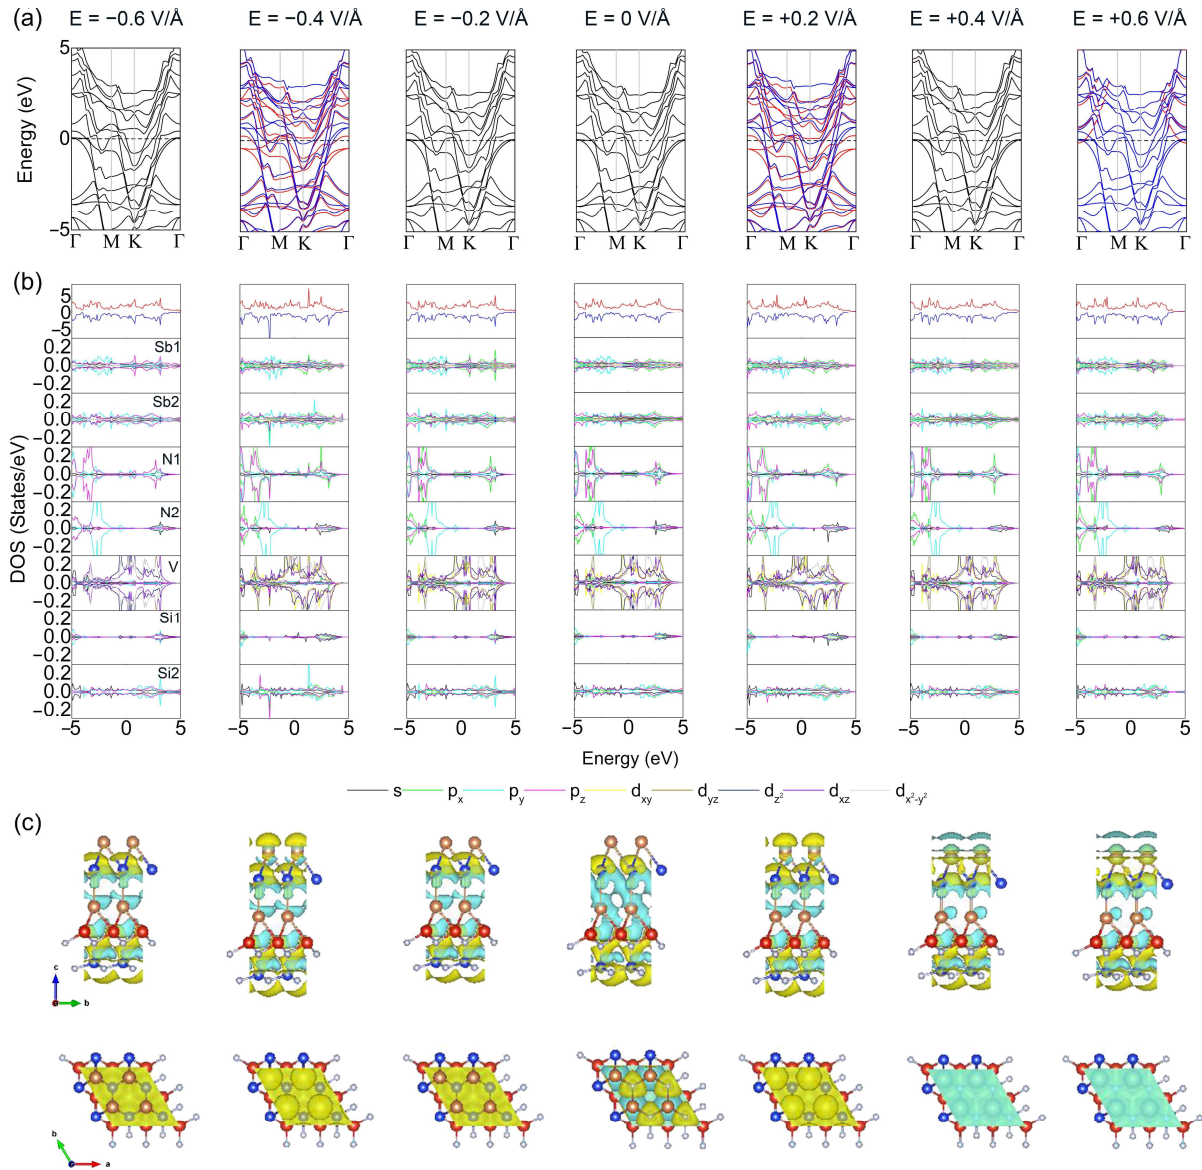

**Figure S6.** The band structure (a) and DOS (b) of  $\text{VSi}_2\text{Sb}_2\text{N}_2$  with different external electric field.

The red and blue represent the spin-up and spin-down channels, respectively, (c) charge density difference of  $\text{VSi}_2\text{Sb}_2\text{N}_2$  with different external electric field.
